# Supplementary material
Source: PubMed Central journal article supplement (PMC3792487)
Supplement: NIHMS514003-supplement-01.pdf [file NIHMS514003-supplement-01.pdf]

## Supplementary Materials:

### Materials and Methods:

#### **M. tuberculosis filter culture and metabolite extraction**

*M. tuberculosis* H37Rv was cultured in a biosafety level 3 facility at 37 °C in Middlebrook 7H9 broth (m7H9) or on 7H10 agar (m7H10) (Difco) supplemented with 0.2% glucose, 0.05% glycerol, 0.04% Tyloxapol, 0.5 g/l bovine serum albumin and 0.085% NaCl. *M. tuberculosis*-laden filters used for MIC determinations and metabolomic profiling were generated as previously described (21, 22) and incubated at 37°C for 5 days to reach the midlogarithmic phase of growth. *M. tuberculosis*-laden filters were transferred onto chemically identical media containing drugs or dimethylsulfoxide vehicle as indicated. MICs were determined by using the same bacterial inoculum size as for metabolomic profiling experiments and identifying the drug concentration needed to suppress visible growth after 14 days of incubation atop drug impregnated agar media. For metabolomic profiling experiments, *M. tuberculosis*-laden filters were metabolically quenched by plunging filters into a mixture of acetonitrile/methanol/H<sub>2</sub>O (40:40:20) precooled to -40°C; metabolites were extracted by mechanical lysis with 0.1 mm Zirconia beads in a Precellys tissue homogenizer for 3 min (6,500 rpm) twice under continuous cooling at or below 2 °C. Lysates were clarified by centrifugation and then filtered across a 0.22 µm filter. Residual protein content of metabolite extracts (BCA protein assay kit, Thermo Scientific) was determined to normalize samples to cell biomass. All data obtained by metabolomics were average of independent triplicates.

#### **Liquid chromatography-coupled mass spectrometry**

Extracted metabolites were separated on a Cogent Diamond Hydride Type C column (Gradient 3) (23). The mobile phase consisted of the following: solvent A (ddH<sub>2</sub>O with 0.2% acetic acid) and solvent B (acetonitrile with 0.2% acetic acid). The gradient used was as follows: 0–2 min, 85% B; 3–5 min, 80% B; 6–7 min, 75%; 8–9 min, 70% B; 10–11.1 min, 50% B; 11.1–14 min 20% B; 14.1–24 min 5% B followed by a 10 min re-equilibration period at 85% B at a flow rate of 0.4 ml/min. The mass spectrometer used was an Agilent Accurate Mass 6220 TOF coupled to an Agilent 1200 LC system. Dynamic mass axis calibration was achieved by continuous infusion of a reference mass solution using an isocratic pump with a 100:1 splitter. This configuration achieved mass errors of 5 ppm, mass resolution ranging from 10,000 to 25,000 (over *m/z* 121–955 AMU), and 5 log<sub>10</sub> dynamic range. Detected ions were deemed metabolites on the basis of unique accurate mass-retention time identifiers for masses exhibiting the expected distribution of accompanying isotopomers and authentic chemical standards. Metabolite identities were searched for using a mass tolerance of <0.005 Da. Metabolites were quantified using a calibration curve generated with chemical standard spiked into homologous mycobacterial extract to correct for matrix-associated ion suppression effects.

#### **Enzyme assays**

FolP1 from *M. tuberculosis* was cloned, expressed and purified as previously described (11). 6-Hydroxymethyl-7,8-dihydropterin pyrophosphate (H<sub>2</sub>PtePP) substrate was chemically reduced according to literature methods (24) from 6-hydroxymethyl-7,8-pterin pyrophosphate (Schircks Laboratories). FolP1 activity was measured by high performance liquid chromatographic analysis. Reactions contained 50 mM Tris pH 7.5, 5 mM MgCl<sub>2</sub>, 1 mM

dithiothreitol, 10  $\mu\text{M}$  H<sub>2</sub>PtePP (excess), 50 nM FolP1 and varying PABA or PAS. Reactions were initiated by addition of enzyme. Reactions were incubated at 25 °C prior to quenching with 50 mM (final) EDTA. Data were collected using a Phenomenex Luna(2) 2 x 50mm 3 $\mu\text{m}$  100Å C<sub>18</sub> column on an Agilent 1100 LC-MS instrument. Samples were eluted with a gradient of 95% Solvent A (0.1% formic acid in water), 5% Solvent B (0.1% formic acid in acetonitrile) to 5% A, 95 % B in 10 min (0.3 mL/min). Product formation was determined by comparing peak area of H<sub>2</sub>Pte or H<sub>2</sub>PtePAS formed (A<sub>284</sub>) and comparing to a standard curve to determine concentration. Data were fit to the Michaelis-Menten equation to determine  $k_{cat}$  and  $K_M$  values.

FolC from *M. tuberculosis* was cloned, expressed, and purified as previously described (25), modified by the use of unaltered pET-42a vector (Novagen), Factor Xa protease (New England Biolabs) and Factor Xa removal resin (Qiagen), and pGro7 (Takara) chaperones. H<sub>2</sub>Pte(X) was enzymatically synthesized: reactions contained 0.5  $\mu\text{M}$  FolP1, 50 mM Tris pH 7.5, 5 mM MgCl<sub>2</sub>, 1 mM DTT, 20  $\mu\text{M}$  H<sub>2</sub>PtePP, and 24  $\mu\text{M}$  pABA or PAS and were allowed to proceed to completion as judged by LC-MS. H<sub>2</sub>Pte(X) synthesis reactions were added directly to FolC reaction tubes to initiate the FolC reaction. FolC reactions contained (final concentrations) 1  $\mu\text{M}$  FolC, 0.25  $\mu\text{M}$  FolP1, 50 mM Tris pH 7.5, 5 mM MgCl<sub>2</sub>, 1 mM DTT, 200 mM KCl, 5% DMSO, 5 mM L-glutamate, 5 mM ATP, and 10  $\mu\text{M}$  H<sub>2</sub>Pte(X). Reactions were quenched after 45 min at 25 °C with 50 mM EDTA (final concentration) prior to analysis. Data were collected using a Phenomenex Luna(2) 2 x 50mm 3 $\mu\text{m}$  100Å C<sub>18</sub> column on an Agilent 1100 LC-MS instrument. Samples were eluted with a gradient of 100% solvent A (0.1 M ammonium acetate in 1% acetonitrile) to 91% solvent A, 9% solvent B (100% acetonitrile) in 20 min (0.3 mL/min) (modified from Montero and Llorente 1993, DOI: 10.1007/BF02272192). H<sub>2</sub>Pte(X) consumption was monitored by measuring peak area (A<sub>284</sub>) and comparing to initial H<sub>2</sub>Pte(X) peak area following FolP1 reaction.

FolP1 and FolC were >95% pure as judged by SDS-PAGE.

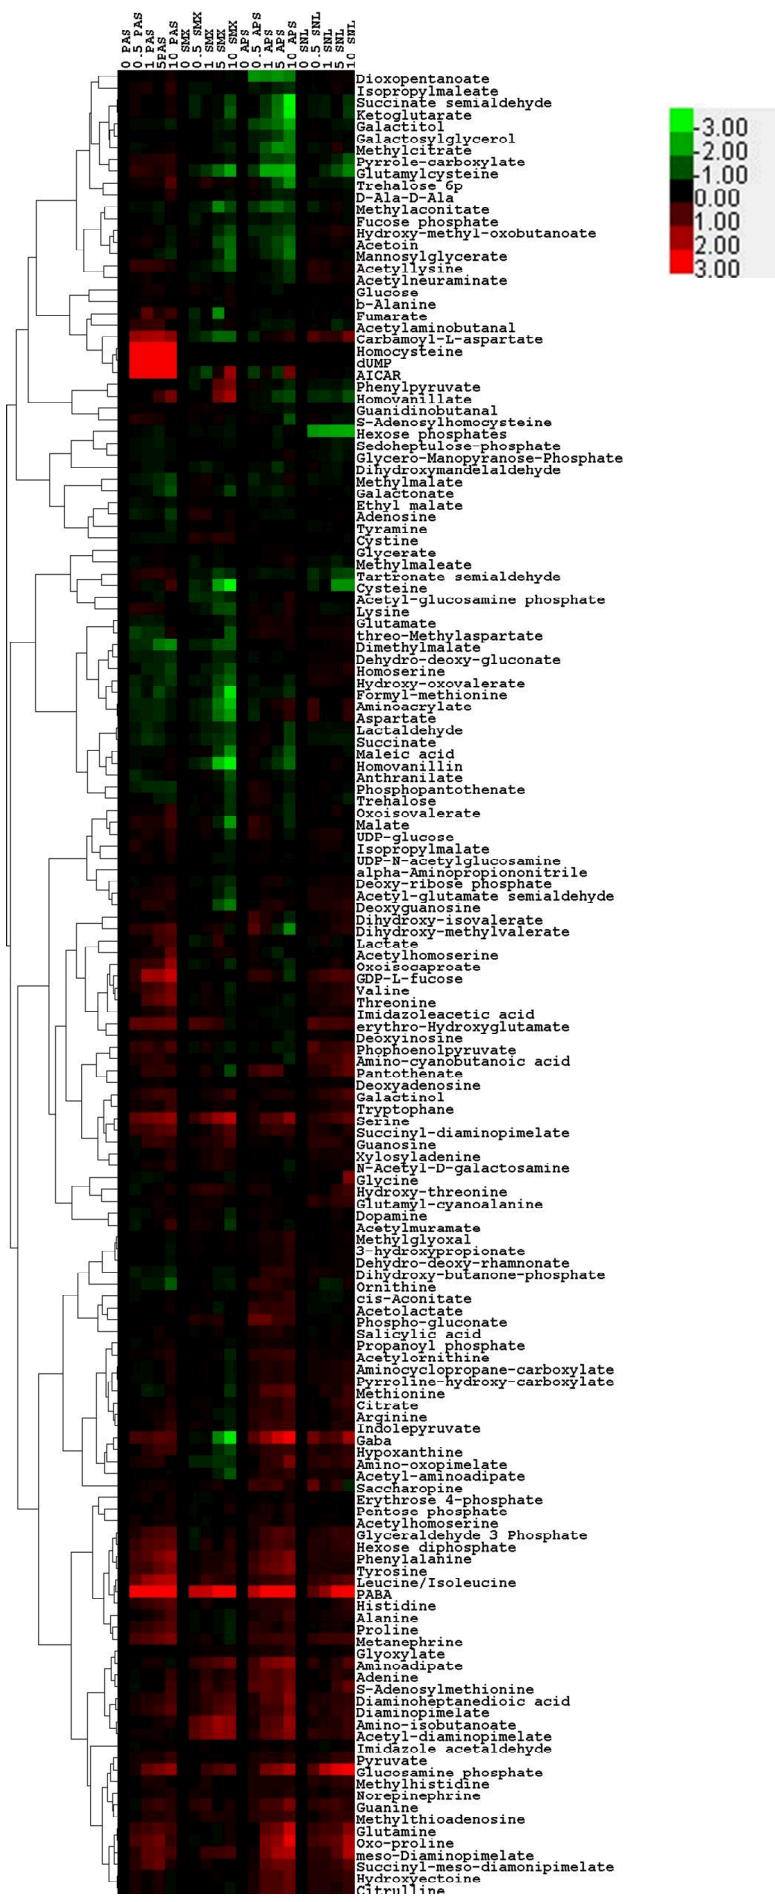

**Fig. S1.** Heatmap representation of 154 intracellular metabolites in *M. tuberculosis* following treatment with drugs as in **1A**. Numbers denote drug concentration expressed in relation to MIC or, for APS and SNL, molar equivalent of SMX doses used. Color intensities correspond to relative levels expressed as the log ratio of the normalized signal intensity in drug-treated cells at each concentration to the normalized signal intensity in the drug-free sample ( $n \geq 2$  independent experiments). Signal intensities were normalized to cell protein biomass at each concentration.

# SZA.

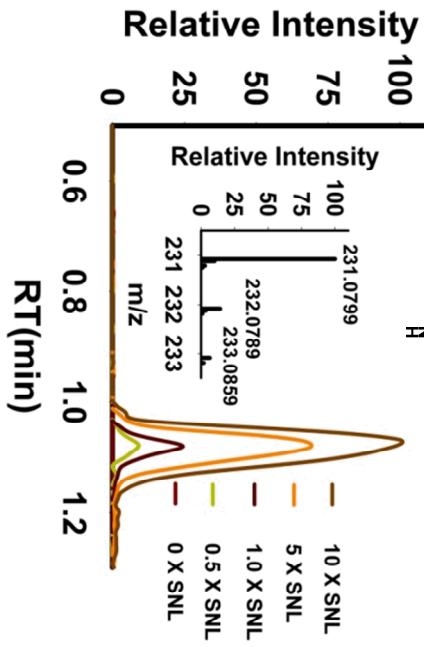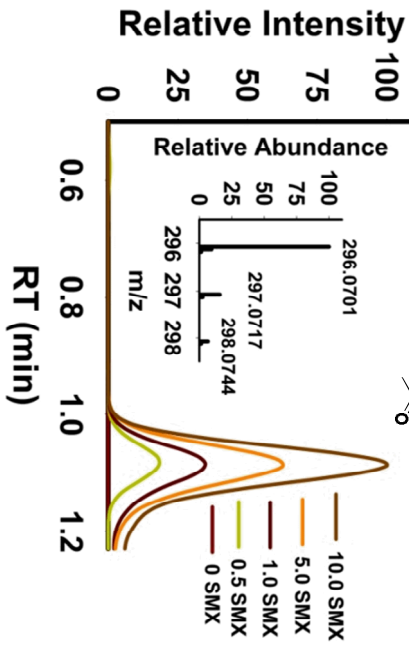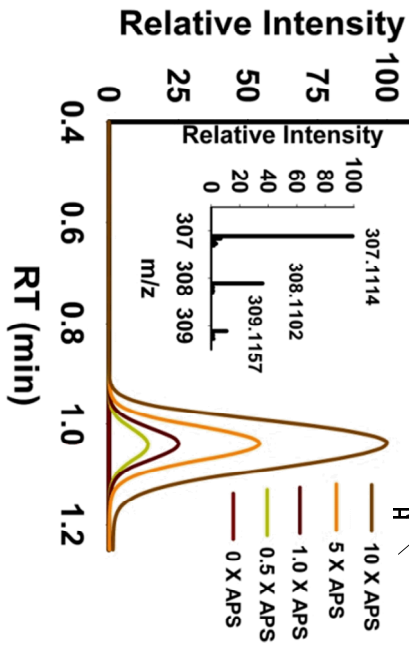

**S2B.**

| Bio-transformed Products | RT.<br>(min) | m/z (M+H) <sup>+</sup><br>obs. | m/z (M+H) <sup>+</sup><br>calc. | error<br>( $\Delta$ ppm) |
|--------------------------|--------------|--------------------------------|---------------------------------|--------------------------|
| Me-PAS                   | 1.02         | 168.0658                       | 168.0655                        | 1.79                     |
| (Me) <sub>2</sub> -PAS   | 1.10         | 182.0814                       | 182.0812                        | 1.10                     |
| PAS-Pte                  | 1.68         | 329.0995                       | 329.0993                        | 0.61                     |
| N-Me-PAS-Pte             | 1.58         | 343.1153                       | 343.1149                        | 1.17                     |
| PAS-Pte-Glu              | 9.41         | 458.1416                       | 458.1419                        | -0.65                    |
| N-Me-Pas-Pte-Glu         | 9.18         | 472.1594                       | 472.1575                        | 4.02                     |
| N-Acetyl -SMX            | 1.08         | 296.0701                       | 296.07                          | 0.33                     |
| Hydroxymethyl-(N-Me)-SNL | 1.07         | 231.0799                       | 231.0798                        | 0.43                     |
| Hydroxymethyl-(N-Me)-APS | 1.04         | 307.1114                       | 307.1111                        | 0.98                     |

**Fig. S2. A.** Extracted ion chromatograms and mass spectra corresponding to exemplary inactive biotransformation products of sulfonamide compounds, demonstrating their compound and dose dependence (left, sulfanilamide; center, sulfamethoxazole; right, aminophenylsulfone). **B.** Accurate mass-retention time pairs for specified biotransformation products, confirmed by co-elution with pure standards for Me-PAS, (Me)<sub>2</sub>-PAS, PAS-Pte.
